# Supplementary material for: Prediction of Biofilm Inhibiting Peptides: An In silico Approach
Source: Front Microbiol. 2016 Jun 16;7:949. doi: 10.3389/fmicb.2016.00949 (PMC4909740; doi:10.3389/fmicb.2016.00949)
Supplement: Supplementary Table S1 — Amino acid composition distribution between biofilm-inhibiting and biofilm non-inhibiting peptides. [file DataSheet1.XLSX]

## Sheet: Table S1
Supplementary Table S1 : Amino acid composition distribution between biofilm-inhibiting and biofilm non-inhibiting peptides
Amino acids	BIPs	Non-BIPs	t-test	STDERR_positivedata	STDERR_negativedata
A	4.046	8.834	0	0.489	0.527
C	1.792	1.163	0.1429	0.368	0.219
D	0.689	5.591	0	0.137	0.448
E	1.207	6.58	0	0.204	0.48
F	6.458	4.282	0.0032	0.618	0.394
G	4.372	6.603	0.0002	0.45	0.385
H	1.865	2.292	0.3915	0.408	0.285
I	9.089	6.751	0.003	0.648	0.439
K	14.552	6.313	0	0.978	0.494
L	8.773	10.055	0.1983	0.826	0.553
M	0.453	1.933	0	0.125	0.221
N	1.28	3.75	0	0.195	0.36
P	1.306	4.374	0	0.227	0.371
Q	1.85	4.096	0	0.232	0.351
R	18.159	5.639	0	1.099	0.373
S	2.328	6.328	0	0.269	0.421
T	1.214	5.008	0	0.205	0.406
V	8.079	6.405	0.0336	0.661	0.422
W	6.881	0.963	0	0.744	0.17
Y	5.605	3.04	0.076	1.408	0.292

## Sheet: Table S2
Supplementary Table S2: Dipeptide composition distribution between biofilm-inhibiting and biofilm non-inhibiting peptides
Dipeptide	BIPs	Non-BIPs	T-test	STDERR_positivedata	STDERR_negativedata
DE	0	0.523	0	0	0.12
EE	0.033	0.45	0	0.024	0.093
FK	1.382	0.238	0	0.245	0.089
IR	3.405	0.462	0	0.459	0.11
IV	1.449	0.297	0	0.239	0.089
KK	3.271	0.7	0	0.49	0.215
KR	1.917	0.392	0	0.269	0.107
LE	0	0.55	0	0	0.109
RI	3.727	0.506	0	0.437	0.113
RK	1.551	0.339	0	0.239	0.095
RR	3.074	0.364	0	0.467	0.1
RV	2.578	0.285	0	0.428	0.072
RW	2.834	0.029	0	0.647	0.021
TI	0	0.495	0	0	0.117
VE	0.043	0.52	0	0.031	0.109
VR	2.08	0.305	0	0.337	0.084
WK	1.178	0.076	0	0.22	0.034
WR	2.708	0.068	0	0.493	0.039
DA	0	0.557	0.0001	0	0.144
EA	0.046	0.602	0.0001	0.034	0.135
EL	0.104	0.722	0.0001	0.065	0.137
ER	0.039	0.424	0.0001	0.028	0.096
IK	1.644	0.182	0.0001	0.364	0.056
KW	0.82	0.03	0.0001	0.203	0.022
LR	1.482	0.471	0.0001	0.24	0.101
LT	0.041	0.739	0.0001	0.029	0.169
SD	0	0.28	0.0001	0	0.068
SS	0.014	0.478	0.0001	0.014	0.116
VD	0	0.439	0.0001	0	0.113
AE	0	0.599	0.0002	0	0.158
ET	0	0.309	0.0002	0	0.082
FR	0.971	0.174	0.0002	0.205	0.052
PV	0.02	0.341	0.0002	0.02	0.082
TG	0.035	0.46	0.0002	0.025	0.108
VQ	0.855	0.176	0.0002	0.169	0.056
WV	0.669	0.025	0.0003	0.175	0.025
AT	0.043	0.482	0.0004	0.032	0.119
LA	0.195	0.734	0.0004	0.075	0.131
YE	0	0.24	0.0005	0	0.068
DG	0.022	0.287	0.0006	0.022	0.073
ID	0	0.478	0.0006	0	0.137
EP	0	0.203	0.0007	0	0.059
QS	0	0.295	0.0007	0	0.086
SV	0.128	0.596	0.0007	0.065	0.121
KF	0.96	0.198	0.0008	0.215	0.061
DR	0	0.326	0.0009	0	0.097
NV	0	0.24	0.0009	0	0.072
FW	0.773	0.032	0.001	0.222	0.023
NP	0	0.234	0.001	0	0.07
AQ	0.031	0.293	0.0011	0.031	0.073
VT	0.062	0.436	0.0013	0.038	0.108
LP	0.073	0.489	0.0015	0.047	0.12
ST	0.036	0.332	0.0015	0.027	0.088
AN	0	0.2	0.0017	0	0.063
IT	0.036	0.37	0.0018	0.026	0.103
TS	0.015	0.199	0.0018	0.015	0.056
DT	0	0.2	0.0019	0	0.064
QA	0.117	0.648	0.0019	0.054	0.16
TV	0.019	0.385	0.0019	0.019	0.115
EQ	0.011	0.212	0.002	0.011	0.063
GN	0	0.198	0.002	0	0.063
IQ	0.014	0.46	0.002	0.014	0.141
ED	0	0.695	0.0022	0	0.224
PY	0	0.184	0.0022	0	0.059
LD	0.156	0.625	0.0023	0.08	0.13
WF	0.437	0	0.0023	0.142	0
MQ	0	0.174	0.0025	0	0.057
KI	1.373	0.385	0.0026	0.306	0.111
VW	0.559	0.065	0.0026	0.158	0.039
DP	0	0.228	0.0029	0	0.076
FE	0.045	0.264	0.003	0.034	0.065
VY	0	0.169	0.003	0	0.056
DL	0.026	0.618	0.0032	0.026	0.196
AD	0	0.329	0.0033	0	0.111
SE	0	0.773	0.0033	0	0.26
PD	0	0.139	0.0036	0	0.047
LV	0.2	0.607	0.0038	0.078	0.116
TK	0.014	0.207	0.0039	0.014	0.065
YV	0	0.149	0.0039	0	0.051
TA	0.015	0.474	0.004	0.015	0.157
GE	0.114	0.408	0.0046	0.047	0.092
YY	4.119	0.138	0.0046	1.389	0.053
NS	0.053	0.423	0.0049	0.031	0.126
LK	1.506	0.596	0.0052	0.288	0.146
LN	0	0.329	0.0054	0	0.117
SL	0.167	0.599	0.0055	0.071	0.137
AG	0.159	0.481	0.0057	0.061	0.098
GS	0.095	0.342	0.0058	0.048	0.075
DD	0	0.51	0.0064	0	0.185
PS	0.021	0.323	0.0072	0.021	0.109
WW	0.588	0.025	0.0073	0.206	0.025
EG	0.067	0.398	0.0074	0.05	0.112
KM	0.015	0.188	0.008	0.015	0.063
PP	0	0.199	0.0081	0	0.074
GT	0.067	0.297	0.0084	0.042	0.076
TD	0	0.233	0.0086	0	0.088
SG	0.146	0.437	0.0091	0.056	0.096
CR	0.34	0.012	0.0092	0.124	0.012
SQ	0	0.19	0.0092	0	0.072
EM	0	0.11	0.0095	0	0.042
GM	0.026	0.203	0.0098	0.026	0.062
EY	0.022	0.259	0.0099	0.022	0.089
IY	0.017	0.236	0.0101	0.017	0.082
NN	0	0.111	0.0102	0	0.043
DN	0.014	0.149	0.0103	0.014	0.05
TR	0.056	0.277	0.0104	0.034	0.079
IA	0.209	0.566	0.0106	0.082	0.112
FQ	0	0.115	0.0108	0	0.045
MS	0	0.132	0.0118	0	0.052
SI	0.105	0.418	0.0119	0.053	0.112
NT	0.011	0.179	0.012	0.011	0.065
MV	0	0.111	0.0124	0	0.044
PG	0.051	0.387	0.0124	0.039	0.128
QR	0.517	0.173	0.0125	0.12	0.066
SN	0.05	0.289	0.0125	0.05	0.081
NY	0	0.137	0.013	0	0.055
YN	0.014	0.208	0.0131	0.014	0.076
WI	0.462	0.1	0.0135	0.138	0.047
QT	0	0.236	0.0138	0	0.095
EN	0	0.344	0.0141	0	0.139
HD	0	0.095	0.0144	0	0.039
QK	0.038	0.229	0.0144	0.029	0.072
DI	0.014	0.411	0.015	0.014	0.161
YT	0	0.083	0.0154	0	0.034
DS	0.022	0.244	0.0156	0.022	0.089
FP	0.03	0.212	0.0156	0.021	0.071
PE	0.014	0.376	0.0157	0.014	0.148
AM	0	0.109	0.016	0	0.045
VH	0	0.208	0.0166	0	0.086
VI	1.233	0.505	0.0177	0.243	0.186
GD	0.121	0.382	0.0181	0.058	0.093
YD	0	0.114	0.0185	0	0.048
AA	0.426	1.081	0.0195	0.187	0.208
DV	0.065	0.35	0.0197	0.046	0.113
IE	0.015	0.443	0.0206	0.015	0.183
NQ	0	0.133	0.0207	0	0.057
KL	1.206	0.557	0.0212	0.25	0.127
YG	0.069	0.288	0.0219	0.035	0.088
ND	0	0.129	0.022	0	0.056
RF	0.872	0.355	0.0222	0.2	0.102
DM	0	0.123	0.0225	0	0.053
DK	0.05	0.493	0.023	0.05	0.187
AS	0.191	0.492	0.0234	0.086	0.1
QN	0.026	0.15	0.0236	0.026	0.047
TL	0.209	0.498	0.0239	0.074	0.104
PA	0.085	0.296	0.0245	0.045	0.082
QE	0.031	0.291	0.0245	0.031	0.11
QH	0	0.108	0.0246	0	0.048
SR	0.101	0.327	0.0259	0.046	0.09
TM	0	0.074	0.0261	0	0.033
MA	0	0.089	0.0262	0	0.04
DQ	0	0.071	0.0263	0	0.032
RD	0.014	0.184	0.0275	0.014	0.075
MP	0	0.087	0.0278	0	0.039
SM	0	0.08	0.0279	0	0.036
TT	0.02	0.135	0.0288	0.02	0.048
PT	0.019	0.121	0.0298	0.019	0.043
IS	0.144	0.563	0.0303	0.051	0.186
VS	0.127	0.397	0.0303	0.048	0.114
IW	0.484	0.049	0.0307	0.198	0.03
QW	0.246	0.02	0.0307	0.102	0.02
EV	0.064	0.243	0.0308	0.052	0.064
RL	1.083	0.572	0.031	0.205	0.116
RQ	0.087	0.384	0.0314	0.054	0.126
MT	0	0.097	0.0342	0	0.045
YQ	0.017	0.165	0.0362	0.017	0.068
FY	0	0.135	0.0364	0	0.064
GK	0.877	0.479	0.0367	0.157	0.106
KY	0.535	0.205	0.0367	0.138	0.075
MI	0	0.128	0.0372	0	0.061
DY	0	0.248	0.0377	0	0.119
MD	0	0.108	0.0385	0	0.052
PQ	0.036	0.175	0.0385	0.036	0.056
AL	0.565	1.071	0.0392	0.15	0.194
IP	0.065	0.357	0.0404	0.038	0.137
LS	0.397	0.762	0.0413	0.12	0.132
ME	0	0.052	0.0471	0	0.026
MM	0	0.067	0.0478	0	0.034
PN	0	0.273	0.0481	0	0.137
HT	0	0.056	0.0486	0	0.028
AY	0.026	0.13	0.0491	0.026	0.045
NE	0.022	0.153	0.0497	0.022	0.063
QQ	0.02	0.134	0.0499	0.02	0.054
KV	0.609	0.245	0.0501	0.171	0.069
YI	0.045	0.284	0.0522	0.045	0.114
VC	0.162	0	0.053	0.083	0
WQ	0.15	0	0.0532	0.077	0
NG	0.077	0.379	0.0537	0.046	0.149
QM	0	0.185	0.0546	0	0.096
GG	0.687	0.347	0.0568	0.158	0.082
MN	0.023	0.136	0.0601	0.023	0.055
PC	0	0.077	0.0623	0	0.041
DF	0.354	0.133	0.0649	0.1	0.065
QD	0.026	0.161	0.0668	0.026	0.068
FF	0.764	0.335	0.0682	0.185	0.145
NM	0.015	0.087	0.0683	0.015	0.036
LW	0.222	0.054	0.0691	0.087	0.032
ES	0.123	0.281	0.0694	0.051	0.07
QI	0.095	0.351	0.0708	0.084	0.114
YK	0.416	0.147	0.0708	0.13	0.072
CV	0.312	0.091	0.0734	0.116	0.038
GV	0.175	0.384	0.0735	0.068	0.095
FA	0.112	0.321	0.0738	0.08	0.085
PW	0.401	0.053	0.0738	0.191	0.031
HN	0	0.079	0.0739	0	0.044
YP	0	0.088	0.0758	0	0.049
SC	0.011	0.09	0.0771	0.011	0.043
WT	0.276	0.017	0.0783	0.146	0.017
RC	0.198	0.035	0.0792	0.089	0.026
KD	0.247	0.653	0.0818	0.078	0.219
EI	0.068	0.382	0.0839	0.039	0.176
EW	0	0.037	0.0841	0	0.021
MF	0	0.044	0.087	0	0.025
PM	0	0.073	0.0897	0	0.043
AI	0.248	0.514	0.0958	0.097	0.126
VG	0.206	0.415	0.0971	0.08	0.097
QP	0.062	0.253	0.0974	0.044	0.106
KQ	0.132	0.368	0.0977	0.071	0.123
YF	0	0.073	0.1028	0	0.045
TW	0	0.077	0.103	0	0.047
PI	0.053	0.158	0.1109	0.041	0.052
TP	0.065	0.185	0.1114	0.041	0.063
TY	0	0.277	0.1127	0	0.174
AR	0.372	0.689	0.1176	0.155	0.13
RT	0.144	0.307	0.1209	0.055	0.089
EH	0	0.137	0.1275	0	0.089
GA	0.238	0.439	0.1354	0.09	0.1
TQ	0.09	0.232	0.139	0.047	0.084
AP	0.188	0.481	0.1454	0.119	0.162
HH	0.285	0.088	0.1484	0.12	0.065
MR	0.033	0.175	0.1515	0.033	0.093
VP	0.142	0.277	0.1531	0.054	0.077
CY	0.123	0.018	0.1575	0.072	0.018
WY	0	0.023	0.1578	0	0.016
WM	0	0.025	0.1579	0	0.018
NW	0.069	0	0.1581	0.049	0
LL	1.816	1.105	0.1592	0.471	0.178
MH	0	0.04	0.1598	0	0.028
CE	0	0.052	0.1612	0	0.037
NA	0.083	0.307	0.1656	0.083	0.138
HM	0	0.031	0.1682	0	0.023
NK	0.101	0.353	0.1685	0.046	0.177
WC	0.081	0	0.1688	0.059	0
RP	0.182	0.35	0.1709	0.066	0.102
CQ	0	0.049	0.1731	0	0.036
MC	0.076	0	0.1774	0.056	0
FM	0	0.033	0.1778	0	0.024
SP	0.13	0.307	0.1783	0.089	0.096
PF	0.175	0.363	0.1871	0.09	0.111
QV	0.249	0.44	0.1898	0.103	0.103
QY	0	0.039	0.1914	0	0.03
GI	0.411	0.619	0.1917	0.101	0.123
GL	0.435	0.67	0.202	0.139	0.121
GQ	0.217	0.451	0.203	0.11	0.147
GY	0.125	0.248	0.2137	0.072	0.069
WG	0.077	0.017	0.2165	0.046	0.017
IM	0.068	0.144	0.2231	0.039	0.048
RY	0.063	0.163	0.2261	0.049	0.067
WL	0.175	0.077	0.2278	0.074	0.034
WH	0	0.077	0.2301	0	0.064
GR	0.429	0.269	0.2347	0.116	0.068
SK	0.504	0.332	0.2558	0.121	0.092
CD	0.031	0.123	0.2629	0.031	0.076
YC	0.058	0.015	0.264	0.036	0.015
RM	0.059	0.133	0.2664	0.044	0.05
FS	0.127	0.25	0.2676	0.059	0.094
EF	0.301	0.191	0.2724	0.085	0.054
PL	0.141	0.249	0.2811	0.067	0.073
HK	0.117	0.325	0.2974	0.069	0.186
GP	0.088	0.163	0.3017	0.047	0.055
WA	0.164	0.077	0.3121	0.077	0.04
VM	0.033	0.091	0.3142	0.033	0.046
HQ	0.053	0.116	0.3145	0.037	0.051
GW	0.09	0.232	0.3172	0.045	0.134
CW	0.045	0	0.3185	0.045	0
DW	0	0.036	0.3185	0	0.036
HW	0	0.062	0.3185	0	0.062
MW	0	0.013	0.3185	0	0.013
MY	0	0.038	0.3185	0	0.038
WD	0	0.018	0.3185	0	0.018
WE	0	0.019	0.3185	0	0.019
WN	0	0.031	0.3185	0	0.031
YH	0	0.013	0.3185	0	0.013
YM	0	0.012	0.3185	0	0.012
RE	0.194	0.316	0.3316	0.092	0.085
KT	0.177	0.297	0.3336	0.075	0.099
NI	0.06	0.128	0.3355	0.048	0.052
VK	0.654	0.427	0.3362	0.218	0.092
EK	0.293	0.419	0.3463	0.083	0.105
FH	0.257	0.096	0.3536	0.165	0.053
TE	0.123	0.202	0.3545	0.051	0.069
CC	0.122	0.042	0.3555	0.083	0.025
YA	0.167	0.304	0.3611	0.118	0.093
AH	0.087	0.159	0.3669	0.043	0.068
KH	0.234	0.141	0.367	0.087	0.054
KE	0.515	0.365	0.3712	0.136	0.098
TN	0.276	0.138	0.3762	0.146	0.056
NL	0.432	0.305	0.3772	0.119	0.08
SW	0.09	0.044	0.3782	0.04	0.033
YL	0.307	0.526	0.3854	0.168	0.189
AF	0.369	0.236	0.3872	0.14	0.063
PR	0.192	0.281	0.392	0.061	0.083
KG	0.239	0.338	0.394	0.077	0.088
MG	0.085	0.151	0.4022	0.059	0.051
KP	0.091	0.159	0.4055	0.058	0.056
PH	0.028	0.068	0.4095	0.028	0.04
AV	0.477	0.631	0.4142	0.136	0.131
IN	0.095	0.181	0.4258	0.084	0.069
CH	0.041	0.015	0.4275	0.03	0.015
FT	0.104	0.185	0.4387	0.049	0.092
KA	0.612	0.478	0.4409	0.14	0.102
HV	0.078	0.156	0.4419	0.049	0.089
NF	0.193	0.34	0.4439	0.12	0.149
PK	0.175	0.27	0.4454	0.077	0.097
AC	0.065	0.112	0.4455	0.04	0.046
HF	0.26	0.13	0.4632	0.162	0.069
IH	0.237	0.163	0.4737	0.089	0.055
TF	0.166	0.243	0.4794	0.06	0.09
NC	0.014	0.033	0.4879	0.014	0.024
CK	0.056	0.026	0.4893	0.033	0.026
DH	0.098	0.053	0.4923	0.061	0.026
KS	0.506	0.393	0.503	0.124	0.114
FC	0.073	0.039	0.5048	0.043	0.028
LH	0.232	0.313	0.5051	0.085	0.088
LC	0.241	0.153	0.5137	0.103	0.088
LM	0.065	0.114	0.5197	0.052	0.054
YW	0.091	0.047	0.5408	0.064	0.033
GF	0.084	0.129	0.5412	0.042	0.061
FV	0.342	0.241	0.5448	0.149	0.076
VF	0.217	0.33	0.5463	0.102	0.157
IL	0.452	0.556	0.5498	0.136	0.11
QL	0.192	0.129	0.5551	0.096	0.048
CP	0.014	0.029	0.5559	0.014	0.02
DC	0.067	0.034	0.5718	0.053	0.025
ML	0.151	0.208	0.5838	0.087	0.058
FG	0.24	0.303	0.5903	0.081	0.085
HP	0.05	0.084	0.5918	0.05	0.038
KC	0.267	0.167	0.5975	0.092	0.167
LF	0.58	0.711	0.6221	0.144	0.223
MK	0.12	0.087	0.6221	0.056	0.035
LG	0.572	0.662	0.6296	0.127	0.135
YR	0.108	0.154	0.6336	0.071	0.066
RH	0.15	0.11	0.6365	0.07	0.047
IG	0.567	0.485	0.6371	0.122	0.124
HC	0.015	0.026	0.6486	0.015	0.019
RG	0.305	0.257	0.6494	0.082	0.067
CA	0.061	0.092	0.651	0.051	0.044
IC	0.099	0.069	0.6512	0.058	0.031
FL	0.548	0.474	0.6545	0.121	0.113
TH	0.071	0.101	0.662	0.054	0.042
KN	0.265	0.223	0.6687	0.075	0.066
QF	0.104	0.151	0.6699	0.075	0.079
CS	0.077	0.105	0.6751	0.053	0.043
VV	0.394	0.459	0.7099	0.131	0.115
CL	0.097	0.129	0.7224	0.055	0.071
QC	0.032	0.05	0.7361	0.022	0.05
IF	0.243	0.202	0.7371	0.099	0.071
HS	0.116	0.143	0.7437	0.052	0.063
WS	0.091	0.118	0.7461	0.064	0.055
TC	0.099	0.124	0.7655	0.046	0.072
RS	0.208	0.238	0.7723	0.078	0.069
FI	0.228	0.269	0.7785	0.104	0.1
HA	0.126	0.151	0.8006	0.066	0.069
SA	0.269	0.301	0.8015	0.098	0.079
NR	0.166	0.187	0.804	0.06	0.056
CT	0.082	0.066	0.815	0.055	0.042
NH	0.031	0.04	0.8166	0.031	0.023
HY	0.035	0.045	0.8249	0.025	0.035
WP	0.111	0.142	0.8395	0.088	0.126
SF	0.213	0.193	0.8442	0.08	0.058
AW	0.121	0.106	0.8458	0.063	0.044
LQ	0.28	0.308	0.8466	0.111	0.093
FN	0.152	0.136	0.8514	0.059	0.068
GC	0.057	0.066	0.8524	0.04	0.034
LY	0.3	0.266	0.8532	0.167	0.072
HL	0.216	0.244	0.854	0.123	0.089
SY	0.117	0.132	0.8653	0.069	0.05
FD	0.083	0.096	0.8655	0.06	0.04
RN	0.263	0.282	0.8714	0.082	0.086
HI	0.109	0.12	0.8732	0.051	0.047
VA	0.602	0.625	0.9132	0.166	0.133
II	0.426	0.445	0.918	0.141	0.132
CG	0.084	0.076	0.9186	0.061	0.049
HG	0.192	0.204	0.9193	0.092	0.071
EC	0.05	0.055	0.9302	0.05	0.035
GH	0.106	0.099	0.9302	0.063	0.04
VN	0.1	0.107	0.9311	0.058	0.052
QG	0.218	0.21	0.9468	0.096	0.066
SH	0.082	0.086	0.954	0.058	0.045
CF	0.031	0.029	0.9614	0.031	0.021
RA	0.598	0.588	0.9633	0.168	0.121
CN	0.015	0.016	0.9647	0.015	0.016
CM	0.056	0.058	0.967	0.056	0.042
VL	0.587	0.595	0.9672	0.154	0.135
AK	0.383	0.379	0.9764	0.112	0.093
HR	0.212	0.209	0.9785	0.076	0.07
YS	0.124	0.123	0.992	0.088	0.044
CI	0.061	0.061	0.9933	0.043	0.051
LI	0.491	0.491	0.9995	0.132	0.106
HE	0.022	0.022	1	0.022	0.022

## Sheet: Table S3
Supplementary Table S3 : MERCI motifs extracted from biofilm-inhibiting and biofilm non-inhibiting peptides
Biofilm-inhibiting motifs	Overall coverage
positive hydrophobic hydrophobic polar hydrophobic hydrophobic charged polar hydrophobic	33
positive hydrophobic hydrophobic polar hydrophobic hydrophobic positive polar hydrophobic	32
positive positive hydrophobic hydrophobic positive hydrophobic	31
positive hydrophobic hydrophobic positive K	31
positive hydrophobic hydrophobic charged hydrophobic hydrophobic charged polar hydrophobic	31
positive hydrophobic hydrophobic charged hydrophobic hydrophobic polar polar hydrophobic	31
positive hydrophobic hydrophobic polar polar hydrophobic hydrophobic charged hydrophobic	31
charged hydrophobic hydrophobic positive hydrophobic hydrophobic polar positive hydrophobic	31
polar hydrophobic positive polar hydrophobic hydrophobic positive	31
aliphatic positive polar hydrophobic hydrophobic positive	31
K charged hydrophobic hydrophobic positive hydrophobic	31
hydrophobic positive hydrophobic hydrophobic positive K	31
hydrophobic hydrophobic charged aromatic hydrophobic positive polar	31
hydrophobic hydrophobic charged hydrophobic aromatic polar charged	31

## Sheet: Table S4
Supplementary Table S4 : Microbial species assayed as positive against biofilm inhibiting peptides in BaAMP database
Acinetobacter baumannii
Aggregatibacter actinomycetemcomitans ATCC 29523
Aggregatibacter actinomycetemcomitans JP2
Aggregatibacter actinomycetemcomitans NCTC 9710 / ATCC 33384
Aggregatibacter actinomycetemcomitans VT726
Aggregatibacter actinomycetemcomitans VT726 ltx-
Aggregatibacter actinomycetemcomitans Y4
Bacillus subtilis
Burkholderia ambifaria
Burkholderia cenocepacia
Burkholderia dolosa
Burkholderia multivorans
Burkholderia pseudomallei
Burkholderia stabilis
Burkholderia thailandensis E264/ATCC 700388
Candida albicans
Candida albicans ATCC 10231
Candida albicans ATCC 18804 / JCM 1542
Candida albicans ATCC-SC5314
Candida albicans B2630
Candida albicans B63195
Candida albicans CAF2
Candida albicans CAF4-2
Candida albicans CAI-4
Candida albicans DAY286
Candida glabrata
Candida glabrata 90030
Candida krusei
Candida tropicalis
Cryptococcus neoformans B3501
Enterococcus faecalis
Enterococcus faecalis ATCC 29212
Enterococcus faecium ATCC 19434
Escherichia coli
Escherichia coli ATCC 25922
Escherichia coli ATCC 8739
Escherichia coli HM22
Escherichia coli O-157 / ATCC 43895
Escherichia coli RP437
Francisella tularensis novicida (BEI NR-13)
Klebsiella pneumoniae ATCC 13883
Klebsiella pneumoniae LM21
Lactobacillus salivarius
Listeria iavanovii Li4pVS2
Listeria monocytogenes
Listeria monocytogenes ATCC 7644
Neurospora crassa CBS 327-54
Porphyromonas gingivalis ATCC 33277
Propionibacterium acnes ATCC 6919
Pseudomonas aeruginosa
Pseudomonas aeruginosa ATCC 15442
Pseudomonas aeruginosa ATCC 27853
Pseudomonas aeruginosa ATCC9027
Pseudomonas aeruginosa PA14
Pseudomonas aeruginosa PAO1 / ATCC 15692
Salmonella enterica Typhimurium ATCC14028
Staphylococcus aureus
Staphylococcus aureus ATCC 25923
Staphylococcus aureus ATCC 29213
Staphylococcus aureus ATCC 29737
Staphylococcus aureus ATCC33591
Staphylococcus aureus ATCC 43300
Staphylococcus aureus ATCC 6538
Staphylococcus aureus Smith diffuse (SD)
Staphylococcus aureus USA300 LAC
Staphylococcus epidermidis
Staphylococcus epidermidis ATCC 35984
Staphylococcus epidermidis MRSE287
Stenotrophomonas maltophilia
Streptococcus gordonii
Streptococcus mutans
Streptococcus mutans ATCC 25175
Streptococcus mutans ATCC 27351
Streptococcus mutans CGMCC 1.2500
Streptococcus mutans Clarke UA159 / ATCC 700610
Streptococcus mutans KCTC 3065
Streptococcus oralis ATCC 10557
Streptococcus parasanguinis ATCC 903
Streptococcus salivarius
Streptococcus salivarius ATCC 7073
Streptococcus sanguinis
Streptococcus sanguinis ATCC 10556
Streptococcus sanguinis NY101
Streptococcus sobrinus ATCC 6715
